# Supplementary material for: The Enigmatic Genetic Landscape of Hereditary Hearing Loss: A Multistep Diagnostic Strategy in the Italian Population
Source: MDPI journal article supplement (doi:10.3390/biomedicines11030703), 2023-02-24
Supplement: s1 [file s1]

**Table S1: Pathogenic variants within *USH2A* and *ADGRV1* genes identified in Italian cohorts.**

Data are aligned to the human genome reference build 37 (GRCh37). *USH2A* and *ADGRV1* gene variants were extracted considering a Minor Allele Frequency <0.05. Functional annotation to determine the variant consequence was performed with bcftools' plug in "Split-VEP". Pathogenicity of the extracted variants was checked in HGMD®. Frequency of the extracted variants was checked in Non-Finnish Europeans in the GnomAD database. **A)** List of the extracted pathogenic variants within *USH2A* gene, **B)** List of the extracted pathogenic variants within *ADGRV1* gene.

Cohort = name of the considered Italian cohort (FVG = Friuli-Venezia Giulia, VBI = Val Borbera, CAR= Carlatino), Chr = chromosome, Pos = genomic position, rsID = unique identifier for a specific variant, Ref = reference allele, Alt = alternative allele, Freq = frequency of the reference allele, N carriers = number of pathogenic variant carriers, Freq gnomAD\_NFE = frequency of the reference allele in Non-Finnish Europeans in the GnomAD database. NA= not available data. The values in brackets represent the total number of individuals for each cohort.

**A)**

| Frequency of <i>USH2A</i> pathogenic variants in Italian cohorts |     |           |             |            |            |             |             |                                                         |            |                     |
|------------------------------------------------------------------|-----|-----------|-------------|------------|------------|-------------|-------------|---------------------------------------------------------|------------|---------------------|
| Cohort                                                           | Chr | Pos       | rsID        | Ref allele | Alt allele | Freq        | Consequence | HGMD<br><i>in-silico</i><br>pathogenicity<br>prediction | N carriers | Freq gnomAD_<br>NFE |
| FVG (n=663)                                                      | 1   | 215628969 | rs111033402 | A          | G          | 0.0015083   | Missense    | Damaging                                                | 2          | 0.0004836           |
|                                                                  | 1   | 215680331 | rs754979740 | T          | C          | 0.000754148 | Missense    | Damaging                                                | 1          | 0.00004418          |
|                                                                  | 1   | 215728232 | rs111033364 | C          | T          | 0.000754148 | Stop gained | Damaging                                                | 1          | 0.0001939           |
|                                                                  | 1   | 215728281 | rs146264950 | C          | T          | 0.000754148 | Missense    | Damaging                                                | 1          | 0.0008272           |
|                                                                  | 1   | 215879002 | rs111033533 | C          | T          | 0.000754148 | Missense    | Damaging                                                | 1          | 0.0006937           |
|                                                                  | 1   | 216000489 | rs55958016  | C          | T          | 0.000754148 | Stop gained | Damaging                                                | 1          | 0.00000000          |
|                                                                  | 1   | 216078145 | rs886039867 | A          | G          | 0.00226244  | Missense    | Damaging                                                | 3          | NA                  |
|                                                                  | 1   | 216289285 | rs146824138 | C          | T          | 0.0015083   | Missense    | Damaging                                                | 2          | 0.001109            |
|                                                                  | 1   | 216325393 | rs780308389 | G          | A          | 0.000754148 | Missense    | Damaging                                                | 1          | 0.00001763          |
|                                                                  | 1   | 216422149 | rs369806765 | C          | T          | 0.00678733  | Missense    | Damaging                                                | 9          | 0.000008816         |

|             |   |           |             |   |   |            |             |          |   |            |
|-------------|---|-----------|-------------|---|---|------------|-------------|----------|---|------------|
| VBI (n=424) | 1 | 216198494 | rs111033524 | C | A | 0.00117925 | Missense    | Damaging | 1 | 0.0001412  |
|             | 1 | 216247118 | rs80338902  | C | A | 0.00117925 | Missense    | Damaging | 1 | 0.001405   |
|             | 1 | 216325540 | rs371777049 | C | T | 0.00117925 | Missense    | Damaging | 1 | 0.00006195 |
| CAR (n=124) | 1 | 215650687 | rs727504867 | G | A | 0.00806452 | Stop gained | Damaging | 2 | 0.00000000 |
|             | 1 | 216073264 | rs111033409 | C | T | 0.00806452 | Missense    | Damaging | 2 | 0.0001679  |
|             | 1 | 216247118 | rs80338902  | C | A | 0.016129   | Missense    | Damaging | 4 | 0.001405   |

B)

| Frequency of <i>ADGRV1</i> pathogenic variants in Italian cohorts |     |          |             |            |            |             |             |                                                |            |                 |
|-------------------------------------------------------------------|-----|----------|-------------|------------|------------|-------------|-------------|------------------------------------------------|------------|-----------------|
| Cohort                                                            | Chr | Pos      | rsID        | Ref allele | Alt allele | Freq        | Consequence | HGMD <i>in-silico</i> pathogenicity prediction | N carriers | Freq gnomAD_NFE |
| FVG (n=663)                                                       | 5   | 90627592 | rs755371825 | C          | A          | 0.0015083   | Missense    | Damaging                                       | 2          | 0.00005314      |
|                                                                   | 5   | 90684054 | rs41308846  | G          | A          | 0.0015083   | Missense    | Damaging                                       | 20         | 0.007248        |
|                                                                   | 5   | 91153342 | rs41311625  | T          | G          | 0.000754148 | Missense    | Damaging                                       | 1          | 0.0004636       |
| VBI (n=424)                                                       | 5   | 90684054 | rs111033524 | G          | A          | 0.00235849  | Missense    | Damaging                                       | 2          | 0.007248        |
|                                                                   | 5   | 90705414 | rs80338902  | G          | A          | 0.00117925  | Missense    | Damaging                                       | 1          | 0.00001779      |
|                                                                   | 5   | 90763453 | rs371777049 | C          | A          | 0.00117925  | Missense    | Damaging                                       | 1          | 0.00559         |
|                                                                   | 5   | 90848725 | rs201073459 | G          | A          | 0.00117925  | Missense    | Damaging                                       | 1          | 0.0001819       |
| CAR (n=124)                                                       | 5   | 90629222 | rs61744480  | A          | C          | 0.00806452  | Missense    | Damaging                                       | 2          | 0.002695        |
|                                                                   | 5   | 90684054 | rs41308846  | G          | A          | 0.0120968   | Missense    | Damaging                                       | 1          | 0.007248        |
